# Supplementary material for: Particle and DBP removal efficiency and toxicity evaluation of polypropylene cotton filters in household drinking water purification systems
Source: Royal Society of Chemistry journal article supplement (doi:10.1039/d3ew00615h), 2023-11-04
Supplement: d3ew00615h1.pdf [file d3ew00615h1.pdf]

1 Supporting information for

2 **Particle and DBPs removal efficiency and toxicity evaluation of**

3 **polypropylene cotton filters in household drinking water purification system**

4 Linlin Pan <sup>a,b</sup>, Yuan Zhuang<sup>b\*</sup>, Ruya Chen <sup>b,d</sup>, Yitian He <sup>b,c</sup>, Baoyou Shi <sup>b,c\*</sup>

5

6 a. School of Municipal and Environmental Engineering, Shandong Jianzhu University,

7 Jinan, 250101, P R China

8 b. Key Laboratory of Drinking Water Science and Technology, Research Center for

9 Eco-Environmental Sciences, Chinese Academy of Sciences, Beijing 100085, China

10 c. University of Chinese Academy of Sciences, Beijing 100049, China

11 d. School of Environmental Science and Engineering, Zhejiang Gongshang University,

12 Hangzhou, 310012, Zhejiang, China

13 \*Corresponding author,

14 Yuan Zhuang, E-mail: [yuanzhuang@rcees.ac.cn](mailto:yuanzhuang@rcees.ac.cn),

15 Baoyou Shi, E-mail: [byshi@rcees.ac.cn](mailto:byshi@rcees.ac.cn)

16

---

## 18 **1. Material and Methods**

### 19 **1.1 Water quality analysis**

20 The excitation-emission matrix (EEM) was used to describe the DOM, which was  
21 recorded using an F-7000 fluorescence spectrophotometer (Hitachi, Chiyoda, Tokyo,  
22 Japan). Excitation wavelengths varied from 200 to 400 nm in 5 nm increments, whereas  
23 emission wavelengths were 220 to 550 nm. To eliminate the majority of the Raman  
24 scatter peaks, an EEM of Milli-Q water was prepared and subtracted from the EEM of  
25 each sample. The Raman water peak was monitored to ensure the fluorescence  
26 spectrophotometer's stability, and the fluorescence intensity was calibrated using this  
27 peak with an excitation wavelength of 350 nm (Zhang et al., 2021). The varied  
28 compositions of DOM were investigated using EEM's parallel factor (PARAFAC)  
29 methodology.

30 Aladdin Co. provided the PFOA (Shanghai, China). Wellington Laboratories  
31 provided a mass-labeled internal standard (Ontario, Canada). To evaluate the residual  
32 PFOA in the solution, a 50 mL water sample was taken at various time intervals and  
33 filtered using a glass fiber filter membrane (GF/F, Whatman). Oasis WAX SPE  
34 cartridges (6 cc, 150 mg, 30 m Waters) were used for sample extraction, and each water  
35 sample was spiked with 2 ng mass-labeled standards. The supporting material contains  
36 detailed information on the extraction. The quantities of PFOA were determined using  
37 an Agilent 1290 Infinity HPLC System in conjunction with an Agilent 6460 Triple

---

38 Quadrupole LC/MS System (Agilent Technologies) in negative electrospray ionization  
39 (ESI-) mode.

## 40 **1.2 Toxicity evaluation**

41 A simple, nonradioactive, colorimetric 3-(4,5-dimethylthiazol-2-yl)-2,5-  
42 diphenyltetrazolium bromide (MTT) test was performed to quantify the cell  
43 cytotoxicity of the iron particles as well as the proliferation or viability of the cells with  
44 the loose deposits (Zhuang et al., 2019). The absorbance value at 570 nm was chosen to  
45 indicate the number of live cells since dimethyl sulfoxide (DMSO) may disintegrate  
46 cell membranes. UV irradiation for 30 minutes sterilized the items used to collect and  
47 logarithmically count the LO<sub>2</sub> cells. After adjusting the cell suspension concentration,  
48 100 µl of suspension was put into each well of a well plate at a rate of 2×10<sup>4</sup> cells per  
49 well. No iron particles were used in the control experiment. The Chinese Academy of  
50 Sciences' Shanghai Cell Bank provided the healthy human liver cells utilized in the  
51 toxicity test. The cells were cultivated in an incubator with a 5% CO<sub>2</sub> environment at  
52 37°C. After 72 h, the cultural media was withdrawn. Each well received 200 µl of a 0.5  
53 mg/ml MTT solution. The medium was withdrawn after incubation, and the formazan  
54 crystals were solubilized in the incubator for 10 minutes with 150 µl of isopropanol. A  
55 microplate reader (EPOCH2T, Biotek) was used to measure the absorbance of each  
56 well at 570 nm. The relative cell viability was obtained by averaging the results of three  
57 replicate tests. After being treated with Calcein-AM, materials were imaged using an  
58 optical microscope (DMI8, Leica) after 72 h.

## 59 **1.3 DNA extraction and quantitative polymerase chain reaction (qPCR)**

---

60 Divide the five-centimeter PP cotton into three layers from the inside and outside,  
61 then cut it into 2mm thick blocks that are one centimeter by one centimeter, place it in  
62 a sterile centrifuge tube, vibrate with ultrasound for 60 minutes, then make three water  
63 samples. All of the tools used in the above procedures were sterilized before being  
64 performed on the sterile operation table. According to a prior study(Jing et al., 2021;  
65 Liu et al., 2017), each sample was filtered through a sterile 0.22 m polycarbonate filter  
66 (Millipore Isopore™, USA) to collect intracellular DNA. The purified amplicons were  
67 delivered to a company (Majorbio BioTech China) for Illumina MiSeq sequencing,  
68 with the raw reads saved in the NCBI Sequence Read Archive (SRA) database  
69 (Accession Number: PRJNA669169, PRJNA669192, PRJNA669206, and  
70 PRJNA669591). The V4-V5 sections of the bacterial 16S rRNA gene were amplified  
71 using the primers 338F (5'-barcode- ACTCCTACGGGAGGCAGCAG -3') and 806R  
72 (5'- GGACTACHVGGGTWTCTAAT -3') (Huo et al., 2021; Liu et al., 2017; Zhang et  
73 al., 2019). The detailed PCR amplification procedures are described elsewhere(Huo et  
74 al., 2021; Jing et al., 2021; Li et al., 2020). The data are shown in Table S1 and S2.

75

76

77

78

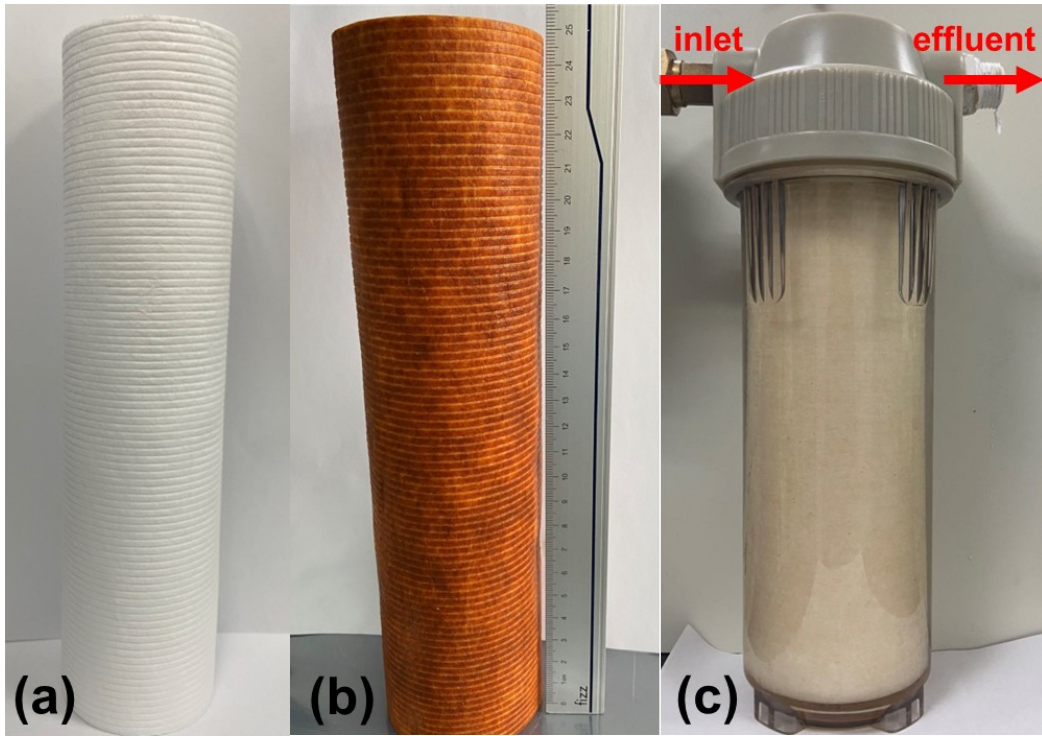

79  
80  
81

**Fig. S1** New and used PCF. (a: New PCF, b: used PCF, c: PCF in use)

82

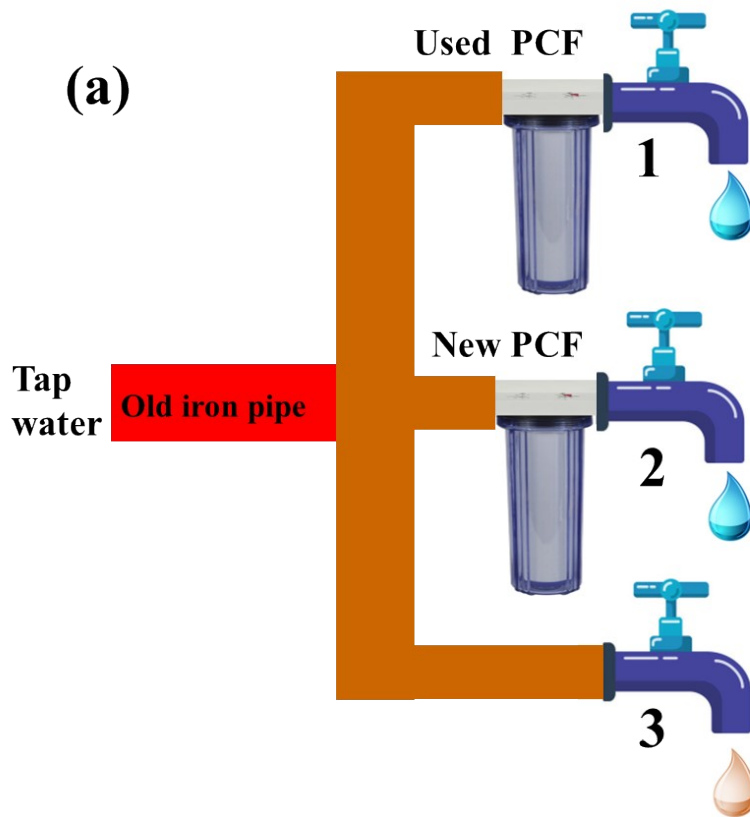

83

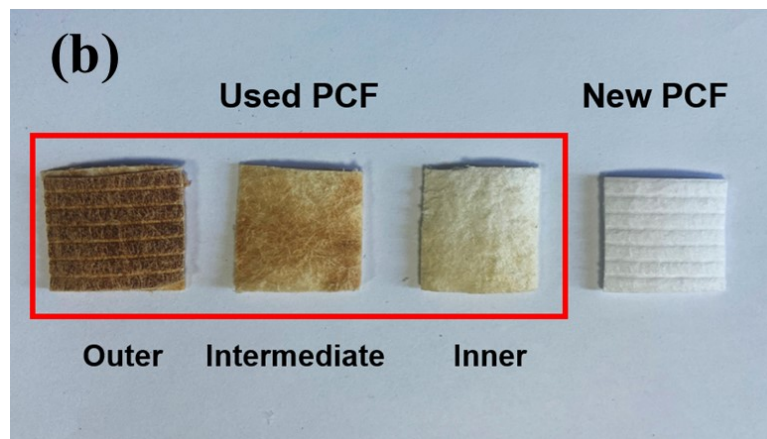

84

85

86

**Fig.S2 (a):** Schematic diagram of experimental device

87 (b): From left to right are the outer layer of used PCF, intermediate layer of used PCF,

88 inner layer of used PCF, and new PCF respectively.

89

90

91

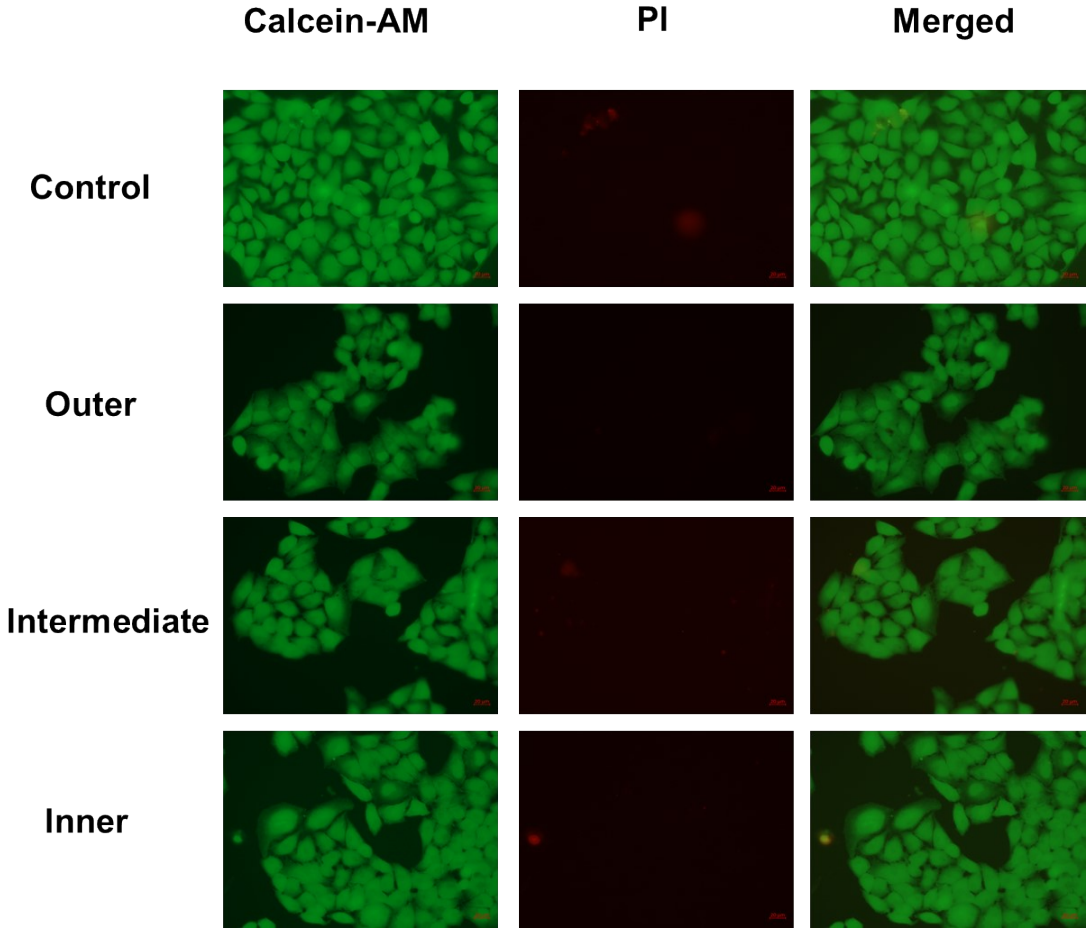

92

93

94

**Fig.S3** Fluorescence microscopy images of cells (green: live cells; red: dead cells)

95

96

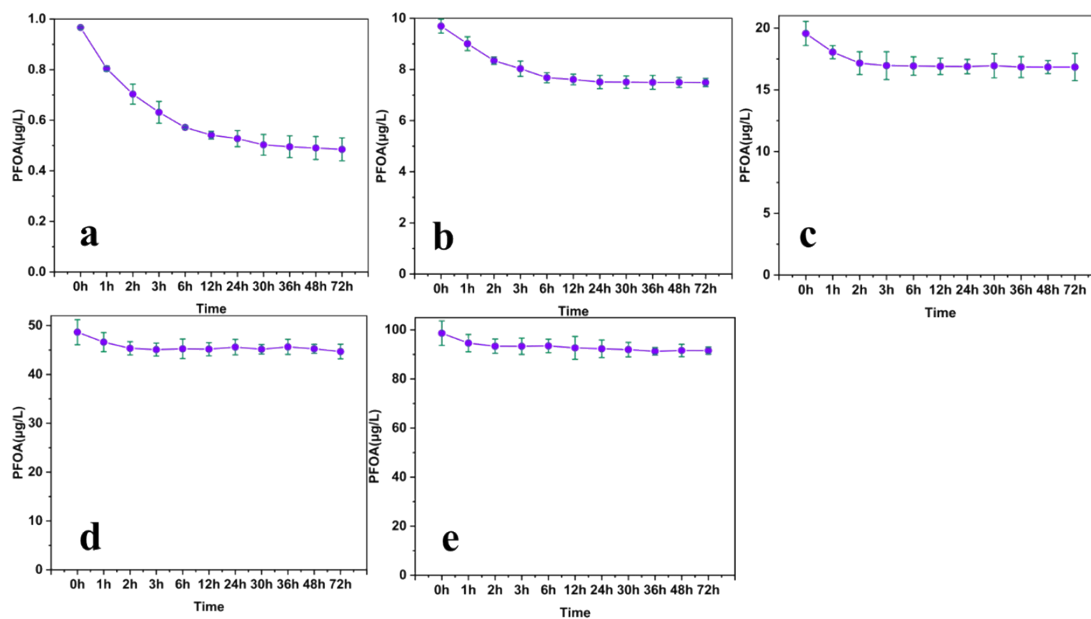

97

98

99 **Fig.S4** The accumulation effect of 0.1g particles of the particles from outer layer of  
100 PCF added to PFOA of different concentration systems. (a: 1 µg/L, b: 10 µg/L, c: 20  
101 µg/L, d: 50 µg/L, e: 100 µg/L)

102

103



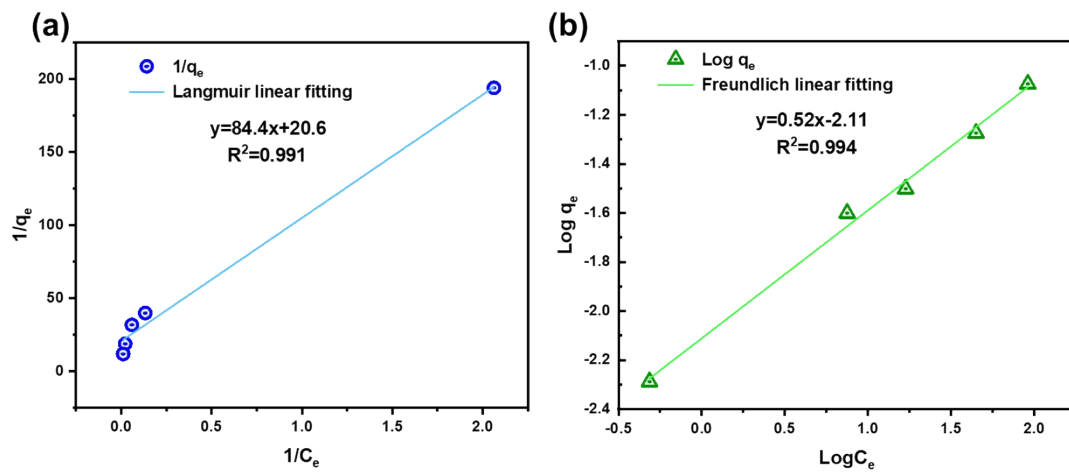

105

106

107

108

109

**Fig. S5** Adsorption isotherms of PFOA onto particles using the Langmuir and Freundlich model (a: Langmuir model, b: Freundlich model)



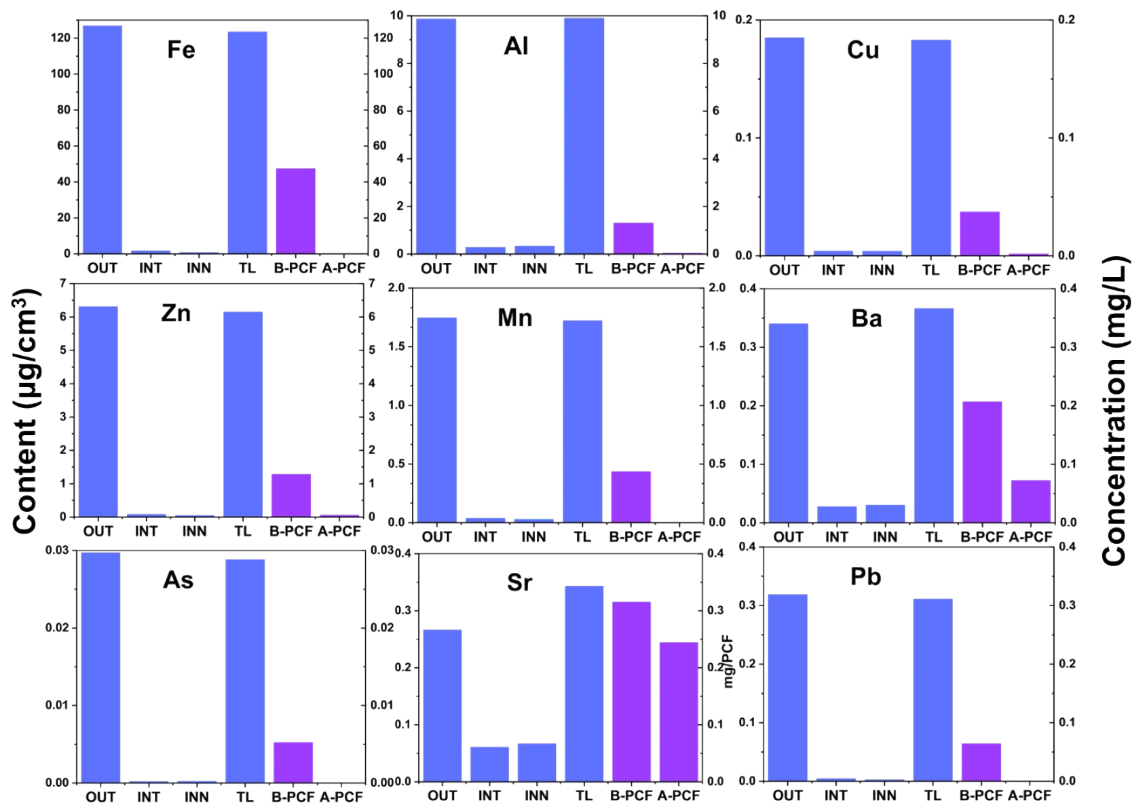

119

120

121

122

123

124

125

126

**Fig. S7** Metals on each layer of PCF, concentration change of metals before and after filtration with PCF (Each figure is from left to right: OUT: outer layer, INT: intermediate layer, INN: inner layer, B-PCF: before filtration of PCF, A-PCF: after filtration of PCF)

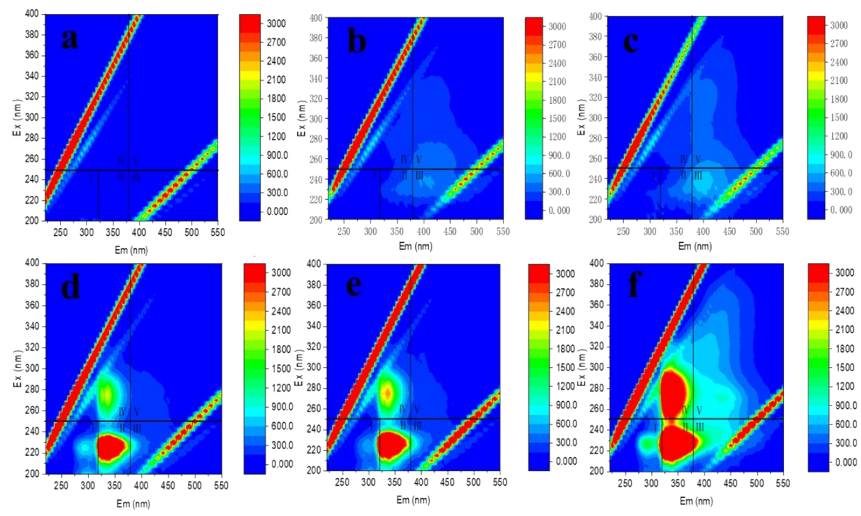

128

129

130

131

132

133

134

135

**Fig. S8** EEMs on each layer of PCF, concentration change of EEMs before and after filtration with PCF (a: pure water, b: after PCF, c: before PCF, d: inner layer, e: intermediate layer, f: outer layer)

---

136

137

138

**Table S1** The DNA concentration of all samples (ng/ $\mu$ L).

---

| Sample                   | Concentration(ng/ $\mu$ L) |
|--------------------------|----------------------------|
| Outer layer              | 3.7                        |
| Intermediate layer       | 1.5                        |
| Inner layer              | $4.05 \pm 0.25$            |
| After filtration of PCF  | $2.80 \pm 0.20$            |
| Before filtration of PCF | $1.95 \pm 0.15$            |

---

139

140

141

142

143

144

145

146

147

148

150 **Table S2** Relative abundance of bacterial composition in biofilm samples at genus  
 151 level.

| <b>OTU ID</b>                           | <b>Inner</b> | <b>Intermediate</b> | <b>Outer</b> |
|-----------------------------------------|--------------|---------------------|--------------|
| <i>Rhodococcus</i>                      | 0.726511     | 0.714295            | 0.465984     |
| <i>Phreatobacter</i>                    | 0.024046     | 0.089672            | 0.354461     |
| <i>Delftia</i>                          | 0.190315     | 0.127461            | 0.046911     |
| <i>Sphingomonas</i>                     | 0.01996      | 0.035292            | 0.06244      |
| <i>Sphingorhabdus</i>                   | 0.000703     | 0.006548            | 0.031881     |
| <i>Chloroplast</i>                      | 0.014481     | 0.010894            | 0.013089     |
| <i>Hyphomicrobium</i>                   | 0.000816     | 0.002651            | 0.007638     |
| <i>Proteobacteria</i>                   | 0.000542     | 0.003172            | 0.004227     |
| <i>norank_f_env.OPS_17</i>              | 0.003946     | 0.002096            | 0.001737     |
| <i>Bradyrhizobium</i>                   | 0.003418     | 0.00199             | 0.001343     |
| <i>Candidatus_Obscuribacter</i>         | 0.00282      | 0.001364            | 0.001716     |
| <i>ProteSphingomonadaceae</i>           | 2.81E-05     | 0.000591            | 0.003299     |
| <i>norank_f_Obscuribacteraceae</i>      | 0.000239     | 0.00083             | 0.001737     |
| <i>norank_f_norank_o_0319-6G20</i>      | 0.001653     | 0.000387            | 0.000331     |
| <i>norank_f_Gemmataceae</i>             | 0.000443     | 0.000239            | 0.000443     |
| <i>unclassified_o_Rhizobiales</i>       | 1.41E-05     | 0.000309            | 0.000577     |
| <i>unclassified_k_norank_d_Bacteria</i> | 7.74E-05     | 0.000352            | 0.000246     |
| <i>Nitrospira</i>                       | 0.000542     | 2.81E-05            | 4.22E-05     |
| <i>Methylotenera</i>                    | 0.000471     | 7.03E-06            | 5.63E-05     |
| <i>norank_f_Saprospiraceae</i>          | 0.00038      | 7.03E-06            | 2.11E-05     |
| <i>DSSF69</i>                           | 3.52E-05     | 0.00012             | 0.000225     |
| <i>Haliangium</i>                       | 0.000316     | 1.41E-05            | 1.41E-05     |
| <i>Aquabacterium</i>                    | 0.00012      | 0.000148            | 7.03E-05     |
| <i>Acinetobacter</i>                    | 0.000239     | 7.03E-05            | 1.41E-05     |
| <i>norank_f_Gemmatimonadaceae</i>       | 0.000295     | 7.03E-06            | 2.11E-05     |
| <i>Cutibacterium</i>                    | 0.000197     | 5.63E-05            | 7.03E-06     |
| <i>Terrimonas</i>                       | 0.000211     | 1.41E-05            | 1.41E-05     |
| <i>Dechloromonas</i>                    | 0.000197     | 7.03E-06            | 1.41E-05     |
| <i>Ralstonia</i>                        | 6.33E-05     | 8.44E-05            | 6.33E-05     |
| <i>JGI_0001001-H03</i>                  | 0.000183     | 0                   | 2.81E-05     |
| <i>Corynebacterium</i>                  | 0.000113     | 2.81E-05            | 7.03E-05     |
| <i>norank_f_SM2D12</i>                  | 0.000113     | 2.81E-05            | 6.33E-05     |
| <i>Nevskia</i>                          | 5.63E-05     | 3.52E-05            | 9.85E-05     |
| <i>Candidatus_Alysiosphaera</i>         | 0.00019      | 0                   | 0            |
| <i>Staphylococcus</i>                   | 0.000105     | 6.33E-05            | 1.41E-05     |
| <i>Denitratisoma</i>                    | 0.000169     | 7.03E-06            | 0            |
| <i>unclassified_f_Hyphomonadaceae</i>   | 2.81E-05     | 3.52E-05            | 9.14E-05     |
| <i>norank_f_SC-I-84</i>                 | 0.000148     | 0                   | 0            |
| <i>norank_f_norank_o_norank_c_OLB14</i> | 0.00012      | 7.03E-06            | 2.11E-05     |
| <i>Ottowia</i>                          | 0.000113     | 2.11E-05            | 1.41E-05     |
| <i>Methylobacterium-Methylorubrum</i>   | 8.44E-05     | 5.63E-05            | 7.03E-06     |
| <i>g_norank_f_norank_o_PLTA13</i>       | 0.000105     | 7.03E-06            | 2.81E-05     |
| <i>norank_f_norank_o_Microtrichales</i> | 0.000113     | 0                   | 2.11E-05     |
| <i>IMCC26207</i>                        | 0.000113     | 0                   | 1.41E-05     |
| <i>Undibacterium</i>                    | 6.33E-05     | 2.81E-05            | 3.52E-05     |
| <i>norank_f_AKYH767</i>                 | 0.000113     | 7.03E-06            | 7.03E-06     |
| <i>Kouleothrix</i>                      | 0.00012      | 0                   | 0            |
| <i>Pelomonas</i>                        | 9.14E-05     | 1.41E-05            | 7.03E-06     |
| <i>norank_f_Caulobacteraceae</i>        | 8.44E-05     | 2.11E-05            | 7.03E-06     |
| <i>Conexibacter</i>                     | 7.74E-05     | 1.41E-05            | 1.41E-05     |
| <i>Burkholderia-Caballeronia-</i>       | 2.81E-05     | 5.63E-05            | 1.41E-05     |

---

|                                         |          |          |          |
|-----------------------------------------|----------|----------|----------|
| <i>Paraburkholderia</i>                 |          |          |          |
| <i>unclassified_f__Methylophilaceae</i> | 7.03E-05 | 2.11E-05 | 7.03E-06 |
| <i>CL500-3</i>                          | 2.81E-05 | 4.22E-05 | 2.81E-05 |
| <i>Candidatus_Berkiella</i>             | 8.44E-05 | 7.03E-06 | 7.03E-06 |
| <i>Mycobacterium</i>                    | 5.63E-05 | 1.41E-05 | 2.81E-05 |
| <i>Pseudomonas</i>                      | 2.81E-05 | 7.03E-06 | 0        |

---

152

153

**Tab.S3** Water quality parameters of red water and tap water before and after treatment with new and used PCF elements

|                | pH   | Free chlorine /mg/L | Temperature (°C) | Conductivity / S/m | Sulfate /mg/L | Turbidity /NTU | Alkalinity /mg/L | Larson Index | Total particles |
|----------------|------|---------------------|------------------|--------------------|---------------|----------------|------------------|--------------|-----------------|
| Tap water      | 7.95 | 0.65                | 27.1             | 465                | 51.5          | 0.44           | 120.3            | 1.34         | 10137           |
| Red water      | 7.87 | 0.55                | 27.5             | 485                | 52.1          | 5.23           | 83.6             | 1.93         | 3652            |
| After used PCF | 7.91 | 0.40                | 27.4             | 473                | 51.1          | 0.89           | 109.3            | 1.45         | 2968            |
| After new PCF  | 7.93 | 0.62                | 27.2             | 450                | 49.6          | 0.29           | 118.6            | 1.30         | 336             |



---

$$\frac{1}{q_e} = \frac{1}{q_m K_L C_e} + \frac{1}{q_m} \quad (\text{S1})$$

where  $C_e$  is the PFOA concentration in solution ( $\mu\text{g/L}$ ) at equilibrium,  $q_e$  denotes the amount adsorbed at equilibrium ( $\text{mg/g}$ ),  $q_m$  is the maximum adsorption capacity of particles ( $\text{mg/g}$ ), and  $K_L$  is the adsorption constant at equilibrium.

$$\log q_e = \log K_f + \frac{1}{n} \log C_e \quad (\text{S2})$$

where  $K_f$  is a constant associated with the adsorption capacity and  $1/n$  is an empirical parameter relating the outer affinity, which varies with the heterogeneity of outer site energy distribution.

## References:

- Huo, L., Pan, L., Chen, R., Shi, B., Wang, H., He, S., 2021. Effects of disinfectants and particles on the occurrence of different microorganisms in drinking water distribution systems. *Environmental science water research & technology* 7(5), 983-992.
- Jing, Z., Lu, Z., Mao, T., Cao, W., Wang, W., Ke, Y., Zhao, Z., Wang, X., Sun, W., 2021. Microbial composition and diversity of drinking water: A full scale spatial-temporal investigation of a city in northern China. *Sci. Total Environ.* 776, 145986.
- Li, W., Tan, Q., Zhou, W., Chen, J., Li, Y., Wang, F., Zhang, J., 2020. Impact of substrate material and chlorine/chloramine on the composition and function of a young biofilm microbial community as revealed by high-throughput 16S rRNA sequencing. *Chemosphere* 242, 125310.
- Liu, G., Tao, Y., Zhang, Y., Lut, M., Knibbe, W., van der Wielen, P., Liu, W., Medema, G., van der Meer, W., 2017. Hotspots for selected metal elements and microbes accumulation and the corresponding water quality deterioration potential in an unchlorinated drinking water distribution system. *Water Res.* 124, 435-445.
- Liu, J., Shentu, H., Chen, H., Ye, P., Xu, B., Zhang, Y., Bastani, H., Peng, H., Chen, L., Zhang, T., 2017. Change regularity of water quality parameters in leakage flow conditions and their relationship with iron release. *Water Res.* 124, 353-362.
- Zhang, J., Li, W., Chen, J., Wang, F., Qi, W., Li, Y., 2019. Impact of disinfectant on bacterial antibiotic resistance transfer between biofilm and tap water in a simulated distribution network. *Environ. Pollut.* 246, 131-140.

- 
- Zhang, Y., Lu, Z., Zhang, Z., Shi, B., Hu, C., Lyu, L., Zuo, P., Metz, J., Wang, H., 2021. Heterogeneous Fenton-like reaction followed by GAC filtration improved removal efficiency of NOM and DBPs without adjusting pH. *Sep. Purif. Technol.* 260, 118234.
- Zhuang, Y., Han, B., Chen, R., Shi, B., 2019. Structural transformation and potential toxicity of iron-based deposits in drinking water distribution systems. *Water Res.* 165, 114999.
